# Supplementary material for: Integrating Global Gene Expression and Radiation Survival Parameters across the 60 Cell Lines of the National Cancer Institute Anticancer Drug Screen
Source: Oxford University Press journal article supplement (doi:10.1158/0008-5472.can-07-2120), 2008-01-15
Supplement: 00085472can072120-sup-new_supplementaldata3.xls [file 00085472can072120-sup-new_supplementaldata3.xls]

## Sheet: down cluster order
Genes in Figure 2A heatmap (in cluster order)
ImageID	Title	Gene	Cluster	Chr	Cytoband	Entrez Gene
36950	Phosphofructokinase, liver	PFKL	Hs.255093	21	21q22.3	5211
36950	Phosphofructokinase, liver	PFKL	Hs.255093	21	21q22.3	5211
173043	Beta-site APP-cleaving enzyme 1	BACE1	Hs.504003	11	11q23.2-q23.3	23621
179776	N/A	N/A	N/A	N/A	N/A	N/A
1505469	Procollagen-lysine, 2-oxoglutarate 5-dioxygenase 3	PLOD3	Hs.153357	7	7q22	8985
1500000	Histone cluster 1, H2bd	HIST1H2BD	Hs.591797	6	6p21.3	3017
154583	Membrane bound O-acyltransferase domain containing 5	MBOAT5	Hs.655248	12	12p13	10162
1555406	Kelch domain containing 3	KLHDC3	Hs.412468	6	6p21.1	116138
1558164	Phosphodiesterase 4A, cAMP-specific (phosphodiesterase E2 dunce homolog, Drosophila)	PDE4A	Hs.89901	19	19p13.2	5141
859660	Sp4 transcription factor	SP4	Hs.88013	7	7p15.3	6671
45556	MAP/microtubule affinity-regulating kinase 3	MARK3	Hs.35828	14	14q32.3	4140
51293	Aminoacylase 1	ACY1	Hs.334707	3	3p21.1	95
51293	Aminoacylase 1	ACY1	Hs.334707	3	3p21.1	95
491066	Activin A receptor, type I	ACVR1	Hs.470316	2	2q23-q24	90
725109	Growth arrest and DNA-damage-inducible, beta	GADD45B	Hs.110571	19	19p13.3	4616
291985	Solute carrier family 26 (sulfate transporter), member 2	SLC26A2	Hs.648366	5	5q31-q34	1836
771308	Aldehyde dehydrogenase 3 family, member B2	ALDH3B2	Hs.87539	11	11q13	222
36374	Cyclin B1	CCNB1	Hs.23960	5	5q12	891
41356	Protein phosphatase 2, regulatory subunit B', alpha isoform	PPP2R5A	Hs.497684	1	1q32.2-q32.3	5525
2018941	Ribosomal RNA processing 1 homolog (S. cerevisiae)	RRP1	Hs.110757	21	21q22.3	8568
129865	Aurora kinase A	AURKA	Hs.250822	20	20q13.2-q13.3	6790
725454	CDC28 protein kinase regulatory subunit 2	CKS2	Hs.83758	9	9q22	1164
531319	Aurora kinase B	AURKB	Hs.442658	17	17p13.1	9212
2017415	Centromere protein A	CENPA	Hs.1594	2	2p24-p21	1058
786067	Cell division cycle 25 homolog B (S. pombe)	CDC25B	Hs.153752	20	20p13	994
136188	Msh homeobox 1	MSX1	Hs.424414	4	4p16.3-p16.1	4487
744047	Polo-like kinase 1 (Drosophila)	PLK1	Hs.592049	16	16p12.1	5347
826217	GTP binding protein 1	GTPBP1	Hs.276925	22	22q13.1	9567
256664	H2A histone family, member X	H2AFX	Hs.477879	11	11q23.2-q23.3	3014
2018976	Pituitary tumor-transforming 1	PTTG1	Hs.350966	5	5q35.1	9232
856289	Cyclin B2	CCNB2	Hs.194698	15	15q22.2	9133
898062	Full-length cDNA clone CS0DD006YE20 of Neuroblastoma Cot 50-normalized of Homo sapiens (human)	N/A	Hs.494347	9	N/A
705064	Transforming, acidic coiled-coil containing protein 3	TACC3	Hs.104019	4	4p16.3	10460
292933	Kinesin family member C1	KIFC1	Hs.436912	6	6p21.3	3833
455128	Cyclin F	CCNF	Hs.1973	16	16p13.3	899
1416055	Extra spindle pole bodies homolog 1 (S. cerevisiae)	ESPL1	Hs.153479	12	12q	9700
743038	Variable charge, Y-linked 1B	VCY1B	Hs.170076	Y	Yq11.21	353513
755581	JTV1 gene	JTV1	Hs.301613	7	7p22	7965
769921	Ubiquitin-conjugating enzyme E2C	UBE2C	Hs.93002	20	20q13.12	11065
770074	Proline rich Gla (G-carboxyglutamic acid) 2	PRRG2	Hs.35101	19	19q13.33	5639
432050	WEE1 homolog (S. pombe)	WEE1	Hs.249441	11	11p15.3-p15.1	7465
742798	Kinesin family member 2C	KIF2C	Hs.69360	1	1p34.1	11004
415102	Cell division cycle 25 homolog C (S. pombe)	CDC25C	Hs.656	5	5q31	995
276915	DNA (cytosine-5-)-methyltransferase 3 beta	DNMT3B	Hs.655708	20	20q11.2	1789
415089	NIMA (never in mitosis gene a)-related kinase 2	NEK2	Hs.153704	1	1q32.2-q41	4751
898286	Cell division cycle 2, G1 to S and G2 to M	CDC2	Hs.334562	10	10q21.1	983
435076	Centromere protein F, 350/400ka (mitosin)	CENPF	Hs.497741	1	1q32-q41	1063
795936	Translin|(xs98) mRNA, 363bp	TSN|N/A	MULTIPLE: Hs.75066Hs.652463	2|2	2q21.1|N/A	7247N/A
489489	Lamin B receptor	LBR	Hs.435166	1	1q42.1	3930
781047	BUB1 budding uninhibited by benzimidazoles 1 homolog (yeast)	BUB1	Hs.469649	2	2q14	699
788256	Kinesin family member 23	KIF23	Hs.270845	15	15q23	9493
842968	BUB1 budding uninhibited by benzimidazoles 1 homolog beta (yeast)	BUB1B	Hs.631699	15	15q15	701
2062329	TTK protein kinase	TTK	Hs.169840	6	6q13-q21	7272
814701	MAD2 mitotic arrest deficient-like 1 (yeast)	MAD2L1	Hs.591697	4	4q27	4085
814270	Cyclin A2	CCNA2	Hs.58974	4	4q25-q31	890
950690	Cyclin A2	CCNA2	Hs.58974	4	4q25-q31	890
785707	Protein regulator of cytokinesis 1	PRC1	Hs.567385	15	15q26.1	9055
291057	Cyclin-dependent kinase inhibitor 2C (p18, inhibits CDK4)	CDKN2C	Hs.525324	1	1p32	1031
727526	Centromere protein E, 312kDa	CENPE	Hs.75573	4	4q24-q25	1062
213850	Four jointed box 1 (Drosophila)	FJX1	Hs.39384	11	11p13	24147
812965	V-myc myelocytomatosis viral oncogene homolog (avian)	MYC	Hs.202453	8	8q24.21	4609
796134	Mitogen-activated protein kinase kinase kinase 7	MAP3K7	Hs.644143	6	6q16.1-q16.3	6885
869187	Endothelial PAS domain protein 1	EPAS1	Hs.468410	2	2p21-p16	2034
128947	Hyaluronan-mediated motility receptor (RHAMM)	HMMR	Hs.72550	5	5q33.2-qter	3161
756405	Inhibitor of DNA binding 3, dominant negative helix-loop-helix protein	ID3	Hs.76884	1	1p36.13-p36.12	3399
365973	Palmitoyl-protein thioesterase 1 (ceroid-lipofuscinosis, neuronal 1, infantile)|Chromosome 21 open reading frame 33	PPT1|C21orf33	MULTIPLE: Hs.3873Hs.413482	1|21	1p32|21q22.3	55388209
207288	Insulin induced gene 1	INSIG1	Hs.520819	7	7q36	3638
366859	Transcribed locus	N/A	Hs.593593	1	N/A
32257	Signal recognition particle 9kDa|HCG1781062	SRP9|hCG_1781062	MULTIPLE: Hs.511425Hs.632087	1|10	1q42.12|10q23.32	6726653226
856961	Eukaryotic translation initiation factor 3, subunit 6 48kDa	EIF3S6	Hs.405590	8	8q22-q23	3646
366971	N/A	N/A	N/A	N/A	N/A	N/A
50905	Cullin-associated and neddylation-dissociated 1	CAND1	Hs.546407	12	12q14	55832
814117	DEAD (Asp-Glu-Ala-Asp) box polypeptide 21|DEAD (Asp-Glu-Ala-Asp) box polypeptide 21	DDX21|DDX21	MULTIPLE: Hs.576875Hs.696064	10|10	10q21|10q21	91889188
785793	Capping protein (actin filament) muscle Z-line, alpha 1	CAPZA1	Hs.514934	1	1p13.2	829
592630	Multiple inositol polyphosphate histidine phosphatase, 1	MINPP1	Hs.121260	10	10q23	9562
139167	Quaking homolog, KH domain RNA binding (mouse)	QKI	Hs.510324	6	6q26-q27	9444
824352	Transcribed locus	N/A	Hs.694937	9	N/A
208161	Transcribed locus, strongly similar to XP_001109676.1 tyrosine 3-monooxygenase/tryptophan 5-monooxygenase activation protein, beta polypeptide [Macaca mulatta]	N/A	Hs.643544	20	N/A
743230	Trophoblast-derived noncoding RNA	TncRNA	Hs.523789	11	11q13.1	283131
183462	Mannosidase, alpha, class 2C, member 1	MAN2C1	Hs.26232	15	15q11-q13	4123
470179	Ataxin 2-like	ATXN2L	Hs.460499	16	16p11	11273
785148	Protein tyrosine phosphatase, receptor-type, Z polypeptide 1	PTPRZ1	Hs.489824	7	7q31.3	5803
230261	V-ral simian leukemia viral oncogene homolog A (ras related)	RALA	Hs.6906	7	7p15-p13	5898
785459	Smoothelin	SMTN	Hs.149098	22	22q12.2	6525
298903	GLI-Kruppel family member GLI2	GLI2	Hs.111867	2	2q14	2736
452676	Calcium channel, voltage-dependent, T type, alpha 1H subunit	CACNA1H	Hs.459642	16	16p13.3	8912
591157	Tetraspanin 15	TSPAN15	Hs.499941	10	10q21.3	23555
40365	SREBF chaperone	SCAP	Hs.531789	3	3p21.31	22937
771272	Ribosomal protein S6 kinase, 90kDa, polypeptide 4	RPS6KA4	Hs.105584	11	11q11-q13	8986
428582	Retinol saturase (all-trans-retinol 13,14-reductase)	RETSAT	Hs.440401	2	2p11.2	54884
179500	LIM domain kinase 1	LIMK1	Hs.647035	7	7q11.23	3984
309032	Cleavage and polyadenylation specific factor 1, 160kDa	CPSF1	Hs.493202	8	8q24.23	29894
264117	Cathepsin D	CTSD	Hs.654447	11	11p15.5	1509
308588	FK506 binding protein 8, 38kDa	FKBP8	Hs.173464	19	19p12	23770
274638	Carbamoyl-phosphate synthetase 2, aspartate transcarbamylase, and dihydroorotase	CAD	Hs.377010	2	2p22-p21	790
1586016	Death-associated protein kinase 3	DAPK3	Hs.631844	19	19p13.3	1613
235938	BCL2-antagonist/killer 1	BAK1	Hs.485139	6	6p21.3	578
50763	Chromobox homolog 6	CBX6	Hs.592201	22	22q13.1	23466
265874	Nuclear factor I/C (CCAAT-binding transcription factor)	NFIC	Hs.170131	19	19p13.3	4782
1388395	Transcribed locus, strongly similar to XP_531299.1 hypothetical protein XP_531299 [Pan troglodytes]	N/A	Hs.181128	X	N/A
1056214	Fizzy/cell division cycle 20 related 1 (Drosophila)	FZR1	Hs.413133	19	19p13.3	51343
726846	Similar to heterogeneous nuclear ribonucleoprotein L isoform a	LOC644390	Hs.655187	15	15q14	644390
1492411	Eukaryotic translation initiation factor 5A	EIF5A	Hs.534314	17	17p13-p12	1984
133717	Thyroid hormone receptor associated protein 3	THRAP3	Hs.585396	1	1p34.3	9967
366105	Protein phosphatase 1, regulatory (inhibitor) subunit 10	PPP1R10	Hs.106019	6	6p21.3	5514
1461138	Histone cluster 1, H4c	HIST1H4C	Hs.46423	6	6p21.3	8364
1842170	Histone cluster 1, H4b	HIST1H4B	Hs.143080	6	6p21.3	8366
323693	Adaptor-related protein complex 1, sigma 1 subunit|Adaptor-related protein complex 1, sigma 1 subunit	AP1S1|AP1S1	MULTIPLE: Hs.489365Hs.563509	7|7	7q22.1|7q22.1	11741174
50615	Heat shock 70kDa protein 1-like	HSPA1L	Hs.690634	6	6p21.3	3305
1591599	Lamin B1	LMNB1	Hs.89497	5	5q23.3-q31.1	4001
242578	Trophinin associated protein (tastin)	TROAP	Hs.524399	12	12q13.12	10024
471902	Calcitonin gene-related peptide-receptor component protein	RCP9	Hs.300684	7	7q11.21	27297
214982	CDC42 effector protein (Rho GTPase binding) 1	CDC42EP1	Hs.225356	22	22q13.1	11135
2021962	HLA-B associated transcript 2	BAT2	Hs.436093	6	6p21.3	7916
435642	Talin 1	TLN1	Hs.471014	9	9p13	7094
703964	Inositol polyphosphate phosphatase-like 1	INPPL1	Hs.523875	11	11q23	3636
487429	Collagen, type VI, alpha 1	COL6A1	Hs.474053	21	21q22.3	1291
343744	H1 histone family, member 0	H1F0	Hs.694881	22	22q13.1	3005
137794	Activin A receptor, type IIB	ACVR2B	Hs.174273	3	3p22	93
754600	Nuclear factor I/X (CCAAT-binding transcription factor)	NFIX	Hs.257970	19	19p13.3	4784
1533767	Arginine-glutamic acid dipeptide (RE) repeats	RERE	Hs.463041	1	1p36.2-p36.1	473
774409	Endoglin (Osler-Rendu-Weber syndrome 1)	ENG	Hs.76753	9	9q33-q34.1	2022
843312	DEAD (Asp-Glu-Ala-Asp) box polypeptide 17	DDX17	Hs.528305	22	22q13.1	10521
782578	MAX dimerization protein 4	MXD4	Hs.655020	4	4p16.3	10608
135538	RE1-silencing transcription factor	REST	Hs.631513	4	4q12	5978
253009	Metastasis associated lung adenocarcinoma transcript 1 (non-coding RNA)	MALAT1	Hs.642877	11	11q13.1	378938
366041	Bromodomain adjacent to zinc finger domain, 1B	BAZ1B	Hs.694847	7	7q11.23	9031
664968	MAX gene associated	MGA	Hs.187569	15	15q14	23269
814696	Transportin 1	TNPO1	Hs.482497	5	5q13.2	3842
23353	Gamma-aminobutyric acid (GABA) A receptor, alpha 6	GABRA6	Hs.90791	5	5q34	2559
754582	Ecotropic viral integration site 2A|Transcribed locus	EVI2A|N/A	MULTIPLE: Hs.591198Hs.662383	17|17	17q11.2|N/A	2123N/A
1942497	RAB7, member RAS oncogene family-like 1	RAB7L1	Hs.115325	1	1q32	8934
2019211	RAB33A, member RAS oncogene family	RAB33A	Hs.654356	X	Xq25	9363
252663	Calbindin 1, 28kDa	CALB1	Hs.65425	8	8q21.3-q22.1	793
284542	Heparan sulfate (glucosamine) 3-O-sulfotransferase 3A1|Transcribed locus, strongly similar to XP_001114463.1 similar to heparan sulfate D-glucosaminyl 3-O-sulfotransferase 3A1 [Macaca mulatta]	HS3ST3A1|N/A	MULTIPLE: Hs.462270Hs.654233	17|17	17p12-p11.2|N/A	9955N/A
1681719	Interleukin 11	IL11	Hs.467304	19	19q13.3-q13.4	3589
727210	CDNA clone IMAGE:5266573	N/A	Hs.567265	16	N/A
2017403	Regulator of G-protein signalling 3	RGS3	Hs.494875	9	9q32	5998
yellow highlighted Image IDs correspond to section marked in Figure 2.
Annotated to Unigene Build 204 using ACID (http://eddie.thep.lu.se/acid/dbinfo.pl)
Ringner et al. (2004) Bioinformatics 20:2305-6.
